# Supplementary material for: B1-insensitive T2 mapping of healthy thigh muscles using a T2-prepared 3D TSE sequence
Source: PubMed Central journal article supplement (PMC5308846; doi:10.1371/journal.pone.0171337), 2017-02-14
Supplement: pone.0171337.s001.pdf [file pone.0171337.s001.pdf]

| Subject | Age       | Muscle | volume (cm <sup>3</sup> ) | T2prep 3D TSE (ms) | 2D MESE (ms) | 3D MESE (ms) | B1 (%)         | B0 (%)         | Fat Fraction (%) |
|---------|-----------|--------|---------------------------|--------------------|--------------|--------------|----------------|----------------|------------------|
| 1       | 29 scan 1 | RFL    | 6.75                      | 33.12 ± 2.32       | 37.96 ± 2.07 | 34.62 ± 2.02 | 61.07 ± 5.13   | 65.25 ± 7.43   | 3.55 ± 2.05      |
|         |           | RFR    | 4.53                      | 29.82 ± 1.45       | 34.51 ± 1.48 | 30.95 ± 2.11 | 113.92 ± 3.42  | -2.18 ± 3.83   | 3.79 ± 2.08      |
|         |           | VLL    | 33.39                     | 34.72 ± 2.29       | 34.71 ± 2.04 | 31.92 ± 2.00 | 90.61 ± 9.71   | 86.48 ± 10.29  | 3.56 ± 2.34      |
|         |           | VLR    | 36.08                     | 30.94 ± 1.58       | 34.49 ± 2.06 | 29.80 ± 3.96 | 111.73 ± 10.6  | -12.25 ± 12.04 | 3.75 ± 2.68      |
|         | scan 2    | RFL    | 7.46                      | 30.50 ± 2.58       | 38.27 ± 3.68 | 36.09 ± 5.96 | 64.18 ± 7.15   | 18.92 ± 8.01   | 3.24 ± 2.66      |
|         |           | RFR    | 7.75                      | 31.42 ± 10.98      | 35.27 ± 3.56 | 31.42 ± 4.37 | 118.77 ± 3.17  | 6.20 ± 5.64    | 3.89 ± 3.44      |
|         |           | VLL    | 34.22                     | 34.22 ± 2.22       | 34.33 ± 2.28 | 31.53 ± 2.23 | 87.65 ± 7.51   | 31.48 ± 8.05   | 2.99 ± 2.70      |
|         |           | VLR    | 27.38                     | 29.77 ± 4.74       | 34.59 ± 3.01 | 28.38 ± 5.12 | 97.16 ± 14.87  | 5.05 ± 4.99    | 3.89 ± 2.77      |
|         | scan 3    | RFL    | 8.33                      | 31.86 ± 4.52       | 37.89 ± 3.61 | 35.72 ± 5.66 | 67.00 ± 7.19   | 7.12 ± 6.79    | 4.18 ± 4.31      |
|         |           | RFR    | 6.25                      | 30.24 ± 5.19       | 34.37 ± 2.52 | 31.12 ± 4.37 | 119.61 ± 4.16  | 15.75 ± 7.35   | 3.39 ± 3.82      |
|         |           | VLL    | 34.73                     | 31.19 ± 4.58       | 34.24 ± 2.23 | 33.10 ± 6.27 | 92.83 ± 8.52   | 19.53 ± 9.52   | 3.48 ± 3.68      |
|         |           | VLR    | 30.13                     | 29.33 ± 5.93       | 34.35 ± 2.83 | 28.98 ± 5.51 | 98.13 ± 21.09  | 21.86 ± 7.11   | 5.28 ± 10.82     |
| 2       | 26 scan 1 | RFL    | 5.59                      | 32.37 ± 2.79       | 38.29 ± 2.66 | 35.14 ± 2.50 | 66.38 ± 5.70   | 19.75 ± 6.18   | 3.36 ± 2.67      |
|         |           | RFR    | 5.41                      | 31.16 ± 2.07       | 35.05 ± 3.23 | 31.15 ± 2.63 | 115.89 ± 3.77  | 12.70 ± 4.47   | 3.39 ± 2.74      |
|         |           | VLL    | 29.19                     | 33.01 ± 2.62       | 36.41 ± 3.20 | 33.19 ± 2.56 | 88.43 ± 5.52   | 9.09 ± 7.48    | 2.72 ± 2.18      |
|         |           | VLR    | 26.38                     | 32.53 ± 1.73       | 35.71 ± 2.52 | 31.14 ± 3.82 | 105.81 ± 7.28  | 17.58 ± 3.95   | 3.43 ± 2.45      |
|         | scan 2    | RFL    | 6.01                      | 30.81 ± 1.57       | 37.54 ± 2.72 | 34.30 ± 2.73 | 63.71 ± 6.59   | 10.99 ± 3.80   | 3.03 ± 2.58      |
|         |           | RFR    | 5.41                      | 28.80 ± 1.21       | 34.43 ± 2.99 | 30.28 ± 2.67 | 112.02 ± 4.53  | 9.56 ± 3.15    | 3.95 ± 2.30      |
|         |           | VLL    | 29.18                     | 31.47 ± 1.56       | 35.75 ± 2.92 | 32.33 ± 2.35 | 90.81 ± 6.00   | 5.15 ± 5.02    | 2.93 ± 2.20      |
|         |           | VLR    | 27.68                     | 31.17 ± 1.61       | 35.31 ± 2.72 | 30.80 ± 3.92 | 102.38 ± 10.34 | 10.66 ± 2.80   | 3.64 ± 2.55      |
|         | scan 3    | RFL    | 5.13                      | 31.67 ± 2.86       | 36.38 ± 2.25 | 33.32 ± 2.13 | 66.93 ± 6.47   | 19.87 ± 5.14   | 4.20 ± 2.60      |
|         |           | RFR    | 4.93                      | 27.81 ± 2.12       | 33.66 ± 2.17 | 29.90 ± 2.70 | 110.53 ± 5.50  | 28.08 ± 4.51   | 3.34 ± 2.78      |
|         |           | VLL    | 29.28                     | 32.15 ± 2.86       | 35.10 ± 2.97 | 32.22 ± 2.71 | 91.03 ± 9.28   | 14.19 ± 4.96   | 2.12 ± 2.17      |
|         |           | VLR    | 25.89                     | 31.63 ± 2.16       | 34.74 ± 2.27 | 30.73 ± 3.59 | 103.04 ± 7.10  | 13.20 ± 6.78   | 3.09 ± 2.54      |

|   |        |        |       |              |              |              |                |               |               |             |
|---|--------|--------|-------|--------------|--------------|--------------|----------------|---------------|---------------|-------------|
| 3 | 24     | scan 1 | RFL   | 8.27         | 29.95 ± 1.36 | 36.04 ± 1.52 | 32.77 ± 1.50   | 67.58 ± 5.28  | -8.72 ± 3.19  | 2.55 ± 2.41 |
|   |        |        | RFR   | 7.33         | 29.29 ± 1.19 | 33.62 ± 1.10 | 30.09 ± 0.96   | 115.62 ± 2.76 | 7.31 ± 5.06   | 2.69 ± 2.31 |
|   |        |        | VLL   | 29.89        | 31.76 ± 1.52 | 34.27 ± 1.89 | 31.64 ± 2.00   | 89.02 ± 6.24  | -11.89 ± 3.03 | 2.63 ± 2.71 |
|   |        |        | VLR   | 28.64        | 30.56 ± 0.96 | 33.68 ± 0.86 | 30.24 ± 2.38   | 103.43 ± 6.90 | 11.24 ± 3.21  | 3.00 ± 2.41 |
|   | scan 2 | RFL    | 8.47  | 29.78 ± 1.53 | 35.63 ± 1.46 | 32.60 ± 2.03 | 67.45 ± 5.73   | -11.91 ± 2.43 | 2.39 ± 2.55   |             |
|   |        | RFR    | 7.35  | 28.99 ± 1.16 | 33.43 ± 1.28 | 30.45 ± 1.62 | 114.94 ± 3.46  | 1.30 ± 4.03   | 3.01 ± 2.33   |             |
|   |        | VLL    | 31.53 | 30.88 ± 1.66 | 33.95 ± 2.17 | 31.11 ± 2.00 | 90.61 ± 6.34   | -10.53 ± 3.24 | 2.92 ± 2.79   |             |
|   |        | VLR    | 29.01 | 30.19 ± 1.06 | 33.48 ± 1.02 | 30.06 ± 2.70 | 97.95 ± 9.51   | 9.31 ± 2.15   | 3.61 ± 2.47   |             |
|   | scan 3 | RFL    | 8.39  | 30.71 ± 1.76 | 35.51 ± 1.50 | 32.48 ± 2.00 | 68.18 ± 4.74   | -10.42 ± 2.48 | 2.58 ± 2.46   |             |
|   |        | RFR    | 8.03  | 29.08 ± 1.41 | 33.45 ± 1.41 | 29.91 ± 1.65 | 117.82 ± 2.95  | 2.33 ± 4.06   | 3.01 ± 2.40   |             |
|   |        | VLL    | 31.46 | 30.82 ± 1.92 | 33.56 ± 2.21 | 30.70 ± 2.09 | 92.22 ± 5.84   | -9.14 ± 3.55  | 2.75 ± 2.84   |             |
|   |        | VLR    | 27.70 | 30.17 ± 1.03 | 33.27 ± 1.07 | 29.92 ± 2.35 | 101.31 ± 7.35  | 9.73 ± 2.12   | 3.36 ± 2.53   |             |
| 4 | 28     | scan 1 | RFL   | 7.53         | 30.11 ± 1.53 | 32.04 ± 1.81 | 28.95 ± 1.38   | 86.91 ± 8.93  | 19.67 ± 4.83  | 5.23 ± 2.78 |
|   |        |        | RFR   | 7.75         | 27.32 ± 1.69 | 32.63 ± 1.87 | 28.76 ± 2.09   | 114.28 ± 5.78 | 16.33 ± 5.38  | 4.79 ± 2.72 |
|   |        |        | VLL   | 41.28        | 29.25 ± 1.31 | 33.20 ± 1.54 | 29.73 ± 1.41   | 108.76 ± 7.20 | 17.65 ± 15.04 | 4.10 ± 2.54 |
|   |        |        | VLR   | 42.99        | 29.56 ± 1.42 | 32.65 ± 1.75 | 29.00 ± 2.64   | 97.69 ± 10.85 | 3.27 ± 14.31  | 4.01 ± 2.28 |
|   | scan 2 | RFL    | 8.56  | 29.56 ± 2.55 | 32.41 ± 2.79 | 29.18 ± 2.22 | 92.91 ± 8.07   | 23.29 ± 1.47  | 4.90 ± 2.81   |             |
|   |        | RFR    | 9.50  | 28.55 ± 1.83 | 33.36 ± 3.59 | 29.23 ± 2.71 | 114.03 ± 5.49  | 5.86 ± 5.39   | 5.17 ± 2.97   |             |
|   |        | VLL    | 46.11 | 29.38 ± 1.59 | 33.02 ± 1.98 | 29.72 ± 1.62 | 103.56 ± 13.38 | 27.80 ± 12.88 | 3.26 ± 2.24   |             |
|   |        | VLR    | 47.78 | 29.72 ± 1.64 | 32.82 ± 2.12 | 29.07 ± 3.12 | 95.33 ± 9.93   | -1.17 ± 13.62 | 4.41 ± 2.65   |             |
|   | scan 3 | RFL    | 6.62  | 29.76 ± 1.65 | 31.26 ± 1.40 | 28.78 ± 2.00 | 91.14 ± 5.78   | 29.83 ± 14.69 | 5.64 ± 4.38   |             |
|   |        | RFR    | 7.06  | 28.80 ± 1.33 | 31.59 ± 1.34 | 28.38 ± 1.77 | 108.87 ± 3.91  | 8.43 ± 12.02  | 5.94 ± 2.96   |             |
|   |        | VLL    | 41.81 | 28.68 ± 1.17 | 32.72 ± 1.15 | 29.68 ± 1.48 | 107.34 ± 8.94  | 28.41 ± 25.51 | 3.90 ± 3.33   |             |
|   |        | VLR    | 43.00 | 29.43 ± 1.07 | 32.28 ± 1.54 | 28.56 ± 2.92 | 98.50 ± 6.52   | 3.28 ± 10.41  | 2.08 ± 3.22   |             |
| 5 | 25     | scan 1 | RFL   | 6.70         | 31.55 ± 2.25 | 35.71 ± 4.01 | 32.42 ± 2.70   | 71.15 ± 6.71  | -11.21 ± 3.30 | 4.30 ± 2.28 |

|   |           |     |       |              |              |              |                |                |             |
|---|-----------|-----|-------|--------------|--------------|--------------|----------------|----------------|-------------|
|   |           | RFR | 8.88  | 30.45 ± 3.35 | 34.91 ± 3.67 | 30.81 ± 2.65 | 113.67 ± 5.30  | 2.11 ± 6.13    | 4.68 ± 2.68 |
|   |           | VLL | 56.89 | 31.94 ± 2.46 | 35.04 ± 4.44 | 31.76 ± 2.81 | 95.70 ± 9.14   | -13.68 ± 10.20 | 3.64 ± 3.18 |
|   |           | VLR | 62.95 | 32.32 ± 4.08 | 35.12 ± 3.91 | 31.23 ± 2.90 | 93.22 ± 11.36  | -5.20 ± 15.31  | 3.31 ± 2.80 |
|   | scan 2    | RFL | 6.85  | 33.12 ± 3.78 | 35.77 ± 3.69 | 32.79 ± 2.79 | 71.73 ± 6.47   | -9.94 ± 5.66   | 4.60 ± 2.47 |
|   |           | RFR | 7.98  | 32.01 ± 3.58 | 35.04 ± 3.71 | 31.67 ± 3.66 | 117.8 ± 4.61   | 0.12 ± 3.64    | 4.75 ± 3.10 |
|   |           | VLL | 54.75 | 32.74 ± 3.45 | 34.86 ± 3.97 | 31.95 ± 3.00 | 99.36 ± 9.98   | -13.71 ± 11.77 | 4.12 ± 3.02 |
|   |           | VLR | 59.14 | 32.67 ± 3.69 | 34.94 ± 3.83 | 31.42 ± 3.09 | 100.32 ± 16.95 | -5.83 ± 10.35  | 3.83 ± 2.82 |
|   | scan 3    | RFL | 6.29  | 33.23 ± 3.04 | 35.60 ± 3.42 | 33.33 ± 3.03 | 70.76 ± 7.80   | 10.84 ± 10.26  | 5.50 ± 2.86 |
|   |           | RFR | 8.61  | 32.21 ± 4.27 | 35.42 ± 3.96 | 32.13 ± 2.80 | 108.57 ± 7.21  | -13.56 ± 15.27 | 5.42 ± 2.88 |
|   |           | VLL | 53.77 | 31.81 ± 3.12 | 34.57 ± 3.88 | 31.46 ± 3.23 | 98.61 ± 9.50   | 6.10 ± 19.81   | 4.30 ± 3.10 |
|   |           | VLR | 60.61 | 32.14 ± 3.73 | 34.73 ± 3.74 | 31.45 ± 3.26 | 97.74 ± 17.02  | -15.25 ± 13.10 | 3.81 ± 2.86 |
| 6 | 29 scan 1 | RFL | 7.47  | 29.30 ± 1.44 | 35.46 ± 2.26 | 32.09 ± 1.59 | 63.86 ± 6.09   | 3.89 ± 6.47    | 3.68 ± 2.54 |
|   |           | RFR | 7.88  | 27.28 ± 1.46 | 32.87 ± 2.47 | 29.12 ± 1.87 | 113.05 ± 3.79  | 5.69 ± 7.81    | 4.24 ± 2.29 |
|   |           | VLL | 46.13 | 29.68 ± 1.12 | 33.29 ± 1.98 | 30.28 ± 1.89 | 92.31 ± 7.68   | 2.18 ± 9.68    | 3.17 ± 2.52 |
|   |           | VLR | 46.92 | 29.06 ± 1.03 | 33.29 ± 1.93 | 29.56 ± 2.23 | 97.03 ± 10.04  | 4.47 ± 11.76   | 3.58 ± 2.68 |
|   | scan 2    | RFL | 7.25  | 30.16 ± 1.56 | 35.64 ± 1.91 | 32.71 ± 1.76 | 61.63 ± 6.98   | 1.91 ± 9.46    | 4.81 ± 2.61 |
|   |           | RFR | 7.03  | 29.30 ± 1.50 | 33.17 ± 1.71 | 29.69 ± 1.62 | 112.84 ± 3.35  | 0.12 ± 5.87    | 4.11 ± 2.31 |
|   |           | VLL | 45.71 | 30.71 ± 1.26 | 33.89 ± 1.55 | 31.05 ± 1.88 | 91.57 ± 9.24   | 4.90 ± 7.47    | 3.02 ± 2.45 |
|   |           | VLR | 43.14 | 30.58 ± 1.15 | 33.52 ± 1.49 | 29.99 ± 2.47 | 101.95 ± 9.03  | 3.84 ± 6.99    | 3.86 ± 2.59 |
|   | scan 3    | RFL | 5.51  | 30.46 ± 1.32 | 34.88 ± 1.54 | 31.64 ± 1.25 | 69.07 ± 6.78   | 6.42 ± 8.89    | 4.60 ± 2.22 |
|   |           | RFR | 6.45  | 28.88 ± 1.16 | 32.97 ± 1.51 | 29.30 ± 1.49 | 114.62 ± 3.48  | -1.21 ± 4.44   | 3.95 ± 2.42 |
|   |           | VLL | 40.80 | 30.35 ± 1.22 | 33.29 ± 1.27 | 30.37 ± 1.74 | 93.33 ± 8.23   | 4.66 ± 9.14    | 2.75 ± 2.33 |
|   |           | VLR | 43.91 | 29.74 ± 1.03 | 33.32 ± 1.58 | 29.38 ± 2.69 | 101.35 ± 11.86 | 2.79 ± 6.54    | 3.63 ± 2.51 |
| 7 | 22 scan 1 | RFL | 10.33 | 30.81 ± 2.97 | 35.36 ± 2.82 | 32.21 ± 2.29 | 69.74 ± 11.54  | 9.73 ± 11.47   | 4.18 ± 2.24 |
|   |           | RFR | 11.88 | 29.36 ± 1.48 | 33.26 ± 1.37 | 29.93 ± 1.36 | 115.75 ± 2.93  | 0.36 ± 3.93    | 3.26 ± 2.52 |
|   |           | VLL | 34.02 | 31.30 ± 2.49 | 33.49 ± 2.28 | 30.97 ± 2.51 | 94.83 ± 4.74   | 24.35 ± 9.43   | 3.58 ± 3.39 |



|           |           |       |              |              |               |                |                |               |
|-----------|-----------|-------|--------------|--------------|---------------|----------------|----------------|---------------|
|           | RFL       | 13.86 | 32.29 ± 3.35 | 36.71 ± 4.42 | 33.28 ± 4.33  | 69.90 ± 12.05  | 29.52 ± 2.41   | 3.18 ± 3.50   |
|           | RFR       | 12.78 | 28.01 ± 2.58 | 34.47 ± 2.95 | 30.03 ± 3.21  | 116.79 ± 8.04  | -11.57 ± 5.57  | 3.12 ± 3.45   |
|           | VLL       | 47.22 | 31.89 ± 1.62 | 35.80 ± 3.20 | 32.25 ± 2.42  | 98.53 ± 8.49   | 28.33 ± 4.24   | 4.73 ± 3.37   |
|           | VLR       | 50.37 | 33.20 ± 2.27 | 35.97 ± 3.13 | 31.86 ± 3.56  | 93.84 ± 14.10  | -38.96 ± 10.01 | 5.24 ± 3.48   |
|           | scan 3    |       |              |              |               |                |                |               |
|           | RFL       | 16.02 | 32.37 ± 3.80 | 36.53 ± 4.23 | 33.39 ± 4.25  | 69.16 ± 9.77   | 17.94 ± 4.05   | 3.77 ± 3.72   |
|           | RFR       | 13.34 | 28.30 ± 1.95 | 34.24 ± 2.83 | 29.96 ± 3.04  | 114.91 ± 7.63  | -9.10 ± 5.61   | 3.32 ± 3.53   |
|           | VLL       | 51.59 | 32.27 ± 2.26 | 35.66 ± 3.37 | 32.56 ± 2.84  | 95.63 ± 10.06  | 15.62 ± 4.84   | 5.24 ± 3.91   |
|           | VLR       | 47.19 | 32.95 ± 2.18 | 35.39 ± 2.91 | 31.56 ± 2.99  | 85.38 ± 19.20  | -36.06 ± 11.09 | 5.53 ± 3.47   |
| <b>10</b> | 22 scan 1 |       |              |              |               |                |                |               |
|           | RFL       | 6.37  | 32.11 ± 4.15 | 42.52 ± 7.56 | 38.77 ± 6.66  | 58.02 ± 7.08   | -18.36 ± 2.47  | 12.79 ± 15.81 |
|           | RFR       | 8.65  | 27.19 ± 1.30 | 33.66 ± 1.79 | 29.89 ± 2.15  | 114.67 ± 5.52  | 18.99 ± 2.55   | 3.04 ± 2.93   |
|           | VLL       | 26.29 | 31.24 ± 1.21 | 33.74 ± 1.54 | 30.51 ± 1.96  | 94.75 ± 8.14   | -29.69 ± 12.35 | 4.67 ± 3.07   |
|           | VLR       | 28.97 | 30.41 ± 1.88 | 33.70 ± 2.48 | 29.48 ± 3.62  | 99.75 ± 16.90  | 16.93 ± 9.00   | 24.82 ± 3.98  |
|           | scan 2    |       |              |              |               |                |                |               |
|           | RFL       | 2.81  | 37.18 ± 6.49 | 46.92 ± 8.13 | 42.44 ± 7.11  | 57.16 ± 7.33   | -18.69 ± 3.81  | 15.19 ± 15.13 |
|           | RFR       | 6.69  | 27.17 ± 1.30 | 33.95 ± 1.66 | 29.91 ± 2.19  | 114.08 ± 3.90  | 20.43 ± 3.99   | 2.67 ± 2.91   |
|           | VLL       | 24.01 | 32.26 ± 1.70 | 34.04 ± 2.15 | 30.75 ± 2.09  | 97.71 ± 7.62   | -34.67 ± 12.92 | 4.68 ± 3.05   |
|           | VLR       | 23.18 | 30.47 ± 2.01 | 33.89 ± 2.33 | 29.32 ± 3.91  | 107.25 ± 19.41 | 29.19 ± 6.31   | 5.25 ± 3.48   |
|           | scan 3    |       |              |              |               |                |                |               |
|           | RFL       | 4.80  | 33.62 ± 3.86 | 41.99 ± 6.12 | 38.41 ± 6.36  | 54.18 ± 7.53   | -19.42 ± 2.29  | 8.80 ± 12.23  |
|           | RFR       | 8.25  | 28.20 ± 1.77 | 34.28 ± 2.25 | 33.12 ± 10.22 | 113.39 ± 4.13  | 11.58 ± 3.41   | 2.23 ± 2.85   |
|           | VLL       | 29.75 | 31.92 ± 1.59 | 34.54 ± 2.39 | 31.06 ± 1.77  | 90.90 ± 7.51   | -29.79 ± 9.85  | 4.54 ± 3.22   |
|           | VLR       | 27.67 | 30.39 ± 2.49 | 34.19 ± 2.75 | 29.54 ± 4.06  | 98.93 ± 13.74  | 9.24 ± 10.61   | 4.49 ± 3.45   |
